# Supplementary material for: Targeting anti-inflammatory immunonanocarriers to human and murine neutrophils via the Ly6 antigen for psoriasiform dermatitis alleviation
Source: Royal Society of Chemistry journal article supplement (doi:10.1039/d2bm01521h), 2022-12-07
Supplement: d2bm01521h1.pdf [file d2bm01521h1.pdf]

Suppl. Table 1. The physicochemical properties of the PLGA nanocarriers

| Formulation | Size (nm)    | PDI       | Zeta potential (mV) |
|-------------|--------------|-----------|---------------------|
| NPs-RFL     | 293.90±6.06  | 0.14±0.04 | -25.74±2.38         |
| NPs-RFL-Ab  | 305.33±36.42 | 0.22±0.16 | -17.91±5.56         |

Each value represents the mean±S.E.M. ( $n=3$ ).

PDI: polydispersity index.

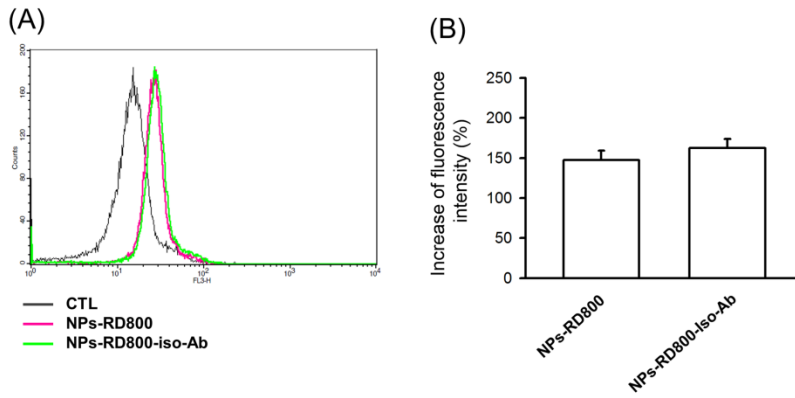

Suppl. Figure 1. The association of rhodamine 800-loaded isotype antibody-conjugated nanoparticles with the human neutrophils examined by flow cytometry

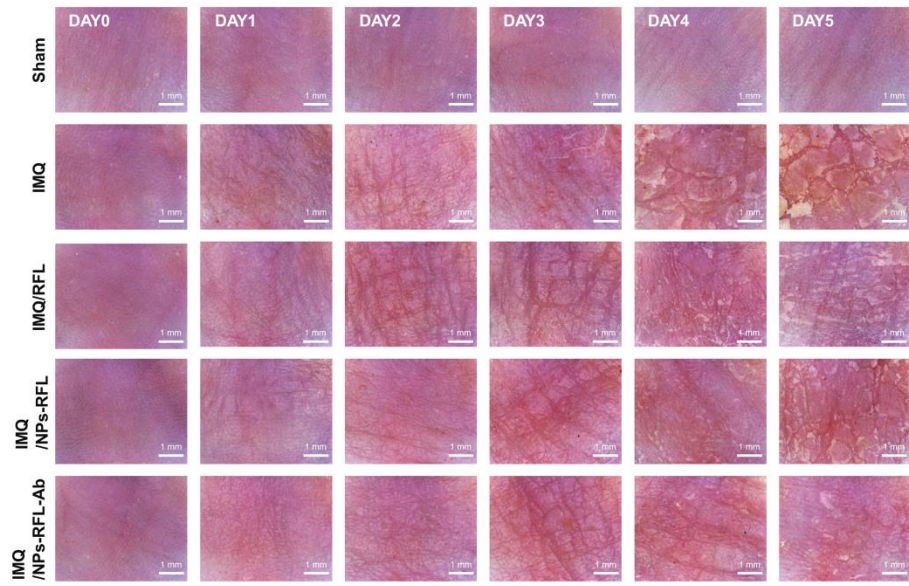

Suppl. Figure 2. Hand-held digital microscopy shows close-up pictures from Day 0 to Day 5

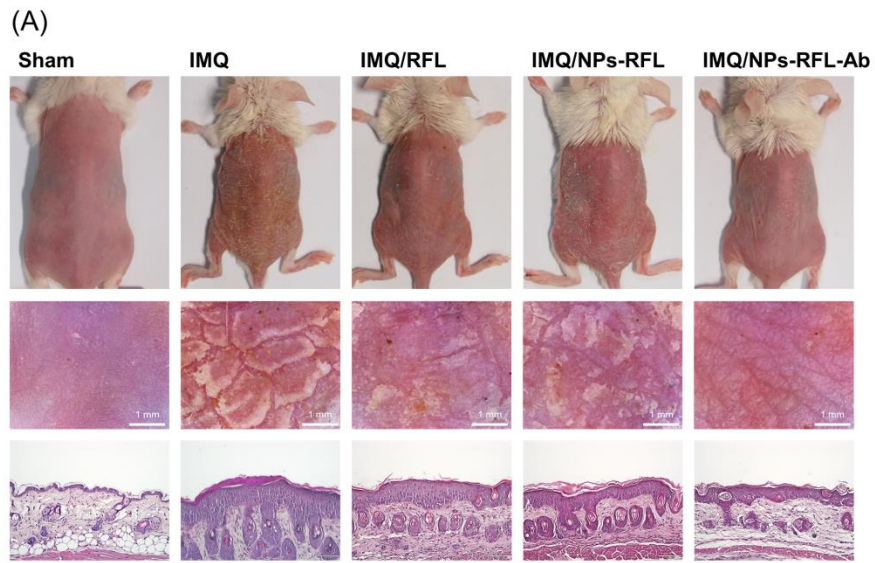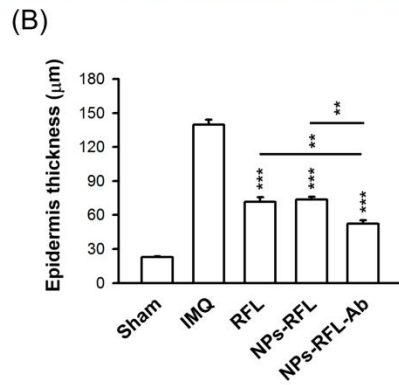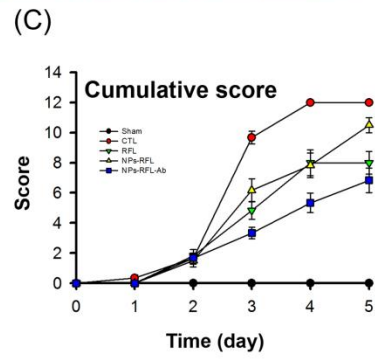

Supp. Figure 3. The neutrophil-targeted PLGA nanoparticles ameliorate IMQ-induced psoriatic skin inflammation by subcutaneous administration

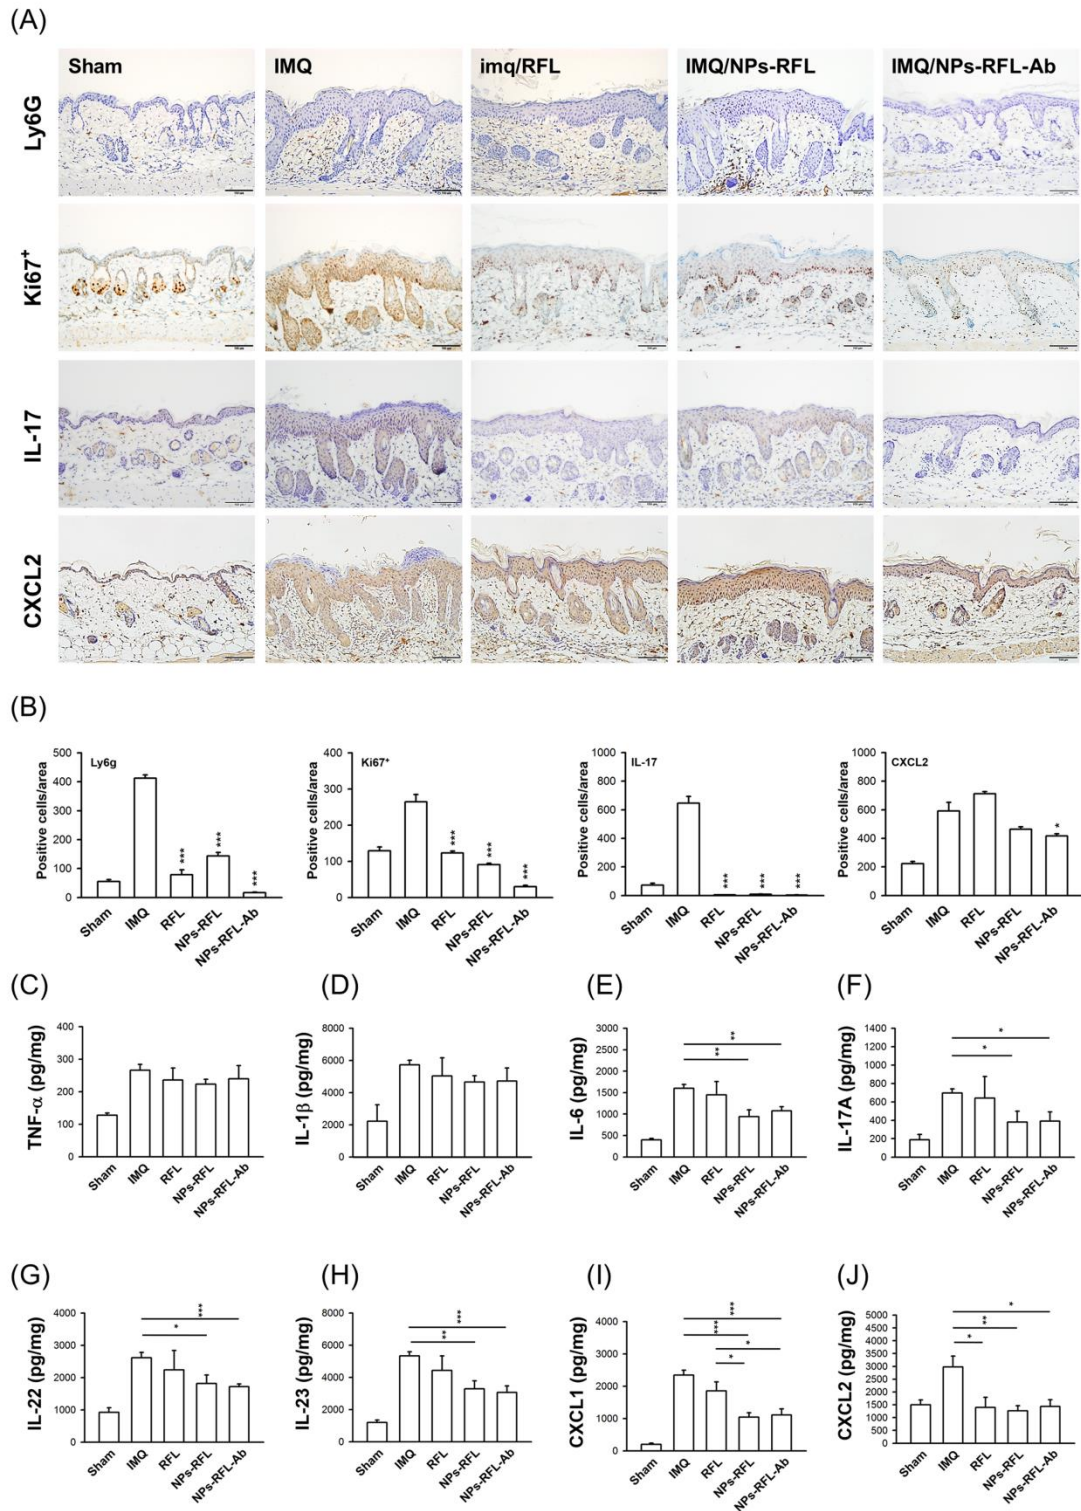

Supp. Figure 4. The monovalent NIMP-R14-conjugated roflumilast-loaded nanoparticles inhibit neutrophil-related cytokines and chemokines in IMQ-induced psoriasis-like skin by subcutaneous administration

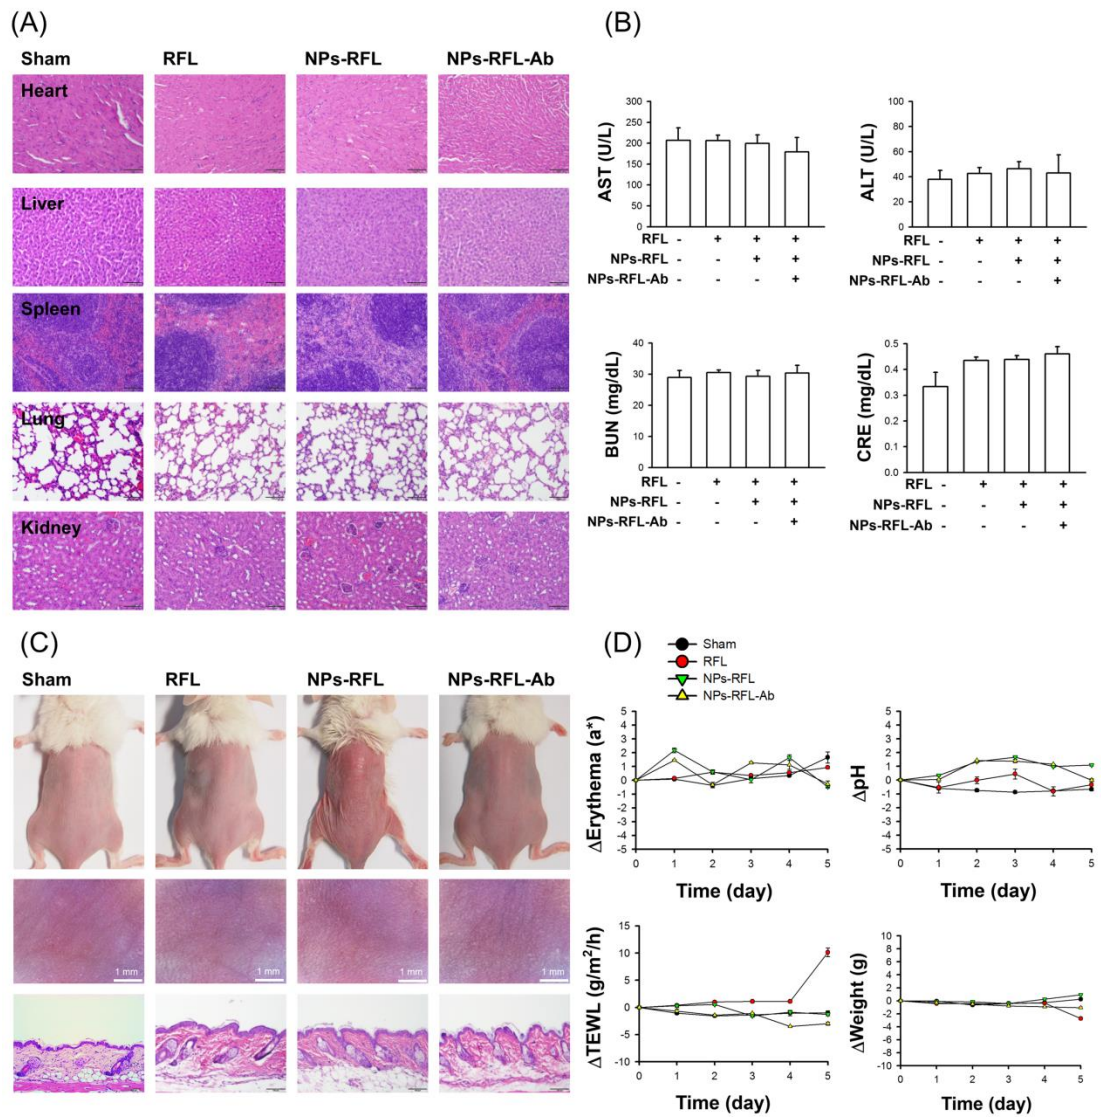

Suppl. Figure 5. Monovalent NIMP-R14-conjugated roflumilast-loaded nanoparticles are biocompatible and safe for repeated subcutaneous dosing
